# Supplementary material for: Synthesis, phase purification and magnetic characterization of the (Cr1−x, Mnx)2AlC MAX-phase
Source: Royal Society of Chemistry journal article supplement (doi:10.1039/d1tc03092b), 2021-01-01
Supplement: d1tc03092b1.pdf [file d1tc03092b1.pdf]

## Synthesis, phase purification and magnetic characterization of the $(\text{Cr}_{1-x}\text{Mn}_x)_2\text{AlC}$ MAX-phase

Kirill Sobolev,<sup>\*a</sup> Hanna Pazniak,<sup>\*\*b</sup> Michael Farle,<sup>b,c</sup> Valeria Rodionova,<sup>a</sup> Ulf Wiedwald<sup>\*\*\*b</sup>

<sup>a</sup>Immanuel Kant Baltic Federal University, 236041, Kaliningrad, Russian Federation.

<sup>b</sup>Faculty of Physics and Center for Nanointegration Duisburg-Essen (CENIDE), University of Duisburg-Essen, 47057 Duisburg, Germany.

<sup>c</sup>Kirensky Institute of Physics, Federal Research Center KSC SB RAS, Krasnoyarsk, 660036, Russian Federation.

E-mails: <sup>\*</sup>kirill\_sobolev-off@mail.ru; <sup>\*\*</sup>hanna.pazniak@uni-due.de; <sup>\*\*\*</sup>ulf.wiedwald@uni-due.de

### SUPPLEMENTARY INFORMATION

Table S1. EDX analysis results for the phases found on SEM images in Figure 1:  $(\text{Cr}_{1-x}\text{Mn}_x)_2\text{AlC}$ ,  $\text{Cr}_5\text{Al}_8$ ,  $\text{Mn}_3\text{AlC}$ . The standard deviation to each value, obtained via gathering point-by-point statistics, is given in brackets. The instrumental error is not included.

| The detected phase                                 | Average measured atomic content, at.% |             |              |              |
|----------------------------------------------------|---------------------------------------|-------------|--------------|--------------|
|                                                    | Cr                                    | Mn          | Al           | C            |
| <b>x = 0</b>                                       |                                       |             |              |              |
| $\text{Cr}_2\text{AlC}$                            | 49.53 (0.84)                          | -           | 24.26 (0.35) | 26.2 (0.59)  |
| $\text{Al}_8\text{Cr}_5$                           | 35.92 (-)                             | -           | 64.08 (-)    | -            |
| <b>x = 0.05</b>                                    |                                       |             |              |              |
| $(\text{Cr}_{0.947}\text{Mn}_{0.053})_2\text{AlC}$ | 47.13 (0.46)                          | 2.66 (0.42) | 23.45 (0.05) | 26.6 (0.38)  |
| $\text{Al}_8(\text{Cr},\text{Mn})_5$               | 18.36 (1.77)                          | 25.6 (1.24) | 56.04 (0.72) | -            |
| <b>x = 0.12</b>                                    |                                       |             |              |              |
| $(\text{Cr}_{0.878}\text{Mn}_{0.122})_2\text{AlC}$ | 43.98 (0.78)                          | 6.14 (0.67) | 23.68 (0.08) | 26.18 (0.16) |
| $\text{Al}_8(\text{Cr},\text{Mn})_5$               | 36.39 (2.38)                          | 9.19 (1.12) | 54.42 (1.26) | -            |
| <b>x = 0.16</b>                                    |                                       |             |              |              |
| $(\text{Cr}_{0.843}\text{Mn}_{0.157})_2\text{AlC}$ | 40.78 (0.36)                          | 7.58 (0.27) | 23.37 (0.2)  | 28.51 (0.94) |
| $(\text{Mn},\text{Cr})_3\text{AlC}$                | 23.38 (1.7)                           | 32.41 (1.6) | 21.16 (0.14) | 23.06 (0.23) |

Table S2. The amount of secondary phases from Rietveld refinements of the powder X-ray diffraction data of  $(\text{Cr}_{1-x}\text{Mn}_x)_2\text{AlC}$  MAX-phase samples before chemical treatment.

| The detected phase       | Average measured atomic content, at.% |                 |                 |                 |
|--------------------------|---------------------------------------|-----------------|-----------------|-----------------|
|                          | <b>x = 0</b>                          | <b>x = 0.05</b> | <b>x = 0.12</b> | <b>x = 0.16</b> |
| $\text{Cr}_2\text{AlC}$  | 98.3                                  | 97.1            | 89.3            | 75.3            |
| $\text{Al}_8\text{Cr}_5$ | 1.7                                   | 2.9             | 6.2             | -               |
| $\text{Mn}_3\text{AlC}$  | -                                     | -               | 4.5             | 24.7            |

*According to the refinement data, undoped  $\text{Cr}_2\text{AlC}$  ( $x = 0$ ) as well as  $\text{Cr}_2\text{AlC}$  doped with 5at.% Mn ( $x = 0.05$ ) are almost phase pure with a small amount of  $\text{Al}_8\text{Cr}_5$  side phase. With increase of Mn doping level ( $x = 0.12$  and  $x = 0.16$ ) the formation of inverse perovskite  $\text{Mn}_3\text{AlC}$  is observed.*

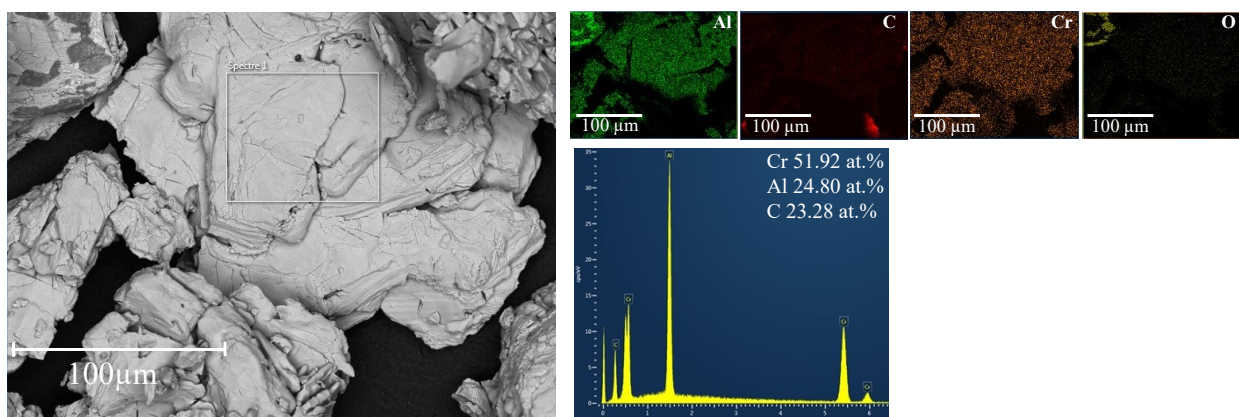

Figure S1. SEM image and EDX mapping of  $\text{Cr}_2\text{AlC}$  powder after chemical treatment.

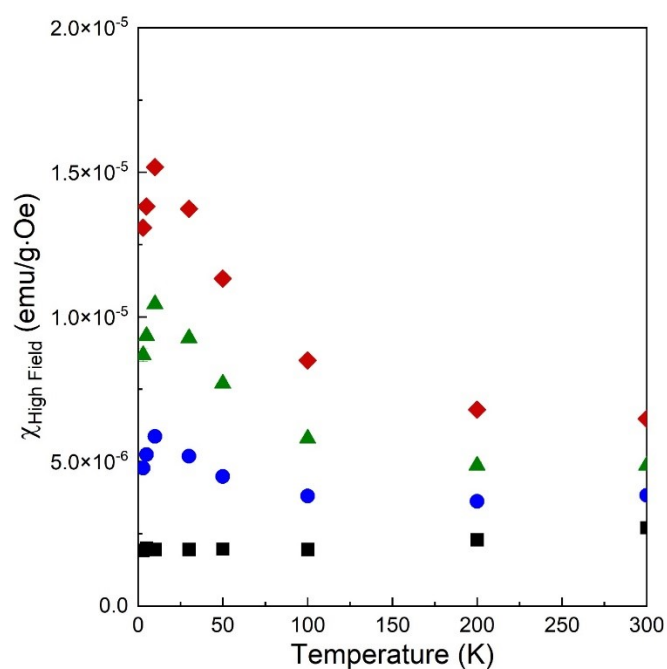

Figure S2. Magnetic high-field susceptibility  $\chi_{\text{High Field}}$  vs T dependences for  $(\text{Cr}_{1-x}\text{Mn}_x)_2\text{AlC}$  MAX-phase samples obtained from the hysteresis at various temperatures with  $x = 0$  (black squares), 0.05 (blue squares), 0.12 (green squares) and 0.16 (red squares).
